# Supplementary material
Source: publisher figshare collection journal article supplement (https://acs.figshare.com/ndownloader/files/5205361)
Supplement: Supplementary file 1 [file 5205361]

# Supporting Information

## High Anodic Performance of Co 1,3,5-Benzenetricarboxylate Coordination Polymers for Li-Ion Battery

Chao Li,<sup>†</sup> Xiaobing Lou,<sup>†</sup> Ming Shen,<sup>†</sup> Xiaoshi Hu,<sup>†</sup> Zhi Guo,<sup>‡</sup> Yong  
Wang,<sup>‡,\*</sup> Bingwen Hu,<sup>†,\*</sup> and Qun Chen<sup>†</sup>

<sup>†</sup>*School of Physics and Materials Science, Shanghai Key Laboratory of Magnetic Resonance, Engineering Research Center for Nanophotonics & Advanced Instrument (Ministry of Education), Institute of functional materials, East China Normal University, Shanghai 200062, PR China.*

<sup>‡</sup>*Shanghai Synchrotron Radiation Facility (SSRF), Shanghai 201204, PR China.*

### Corresponding Author

\*(B.H.) E-mail: bwhu@phy.ecnu.edu.cn.

\*(Y.W.) E-mail: wangyong@sinap.ac.cn.

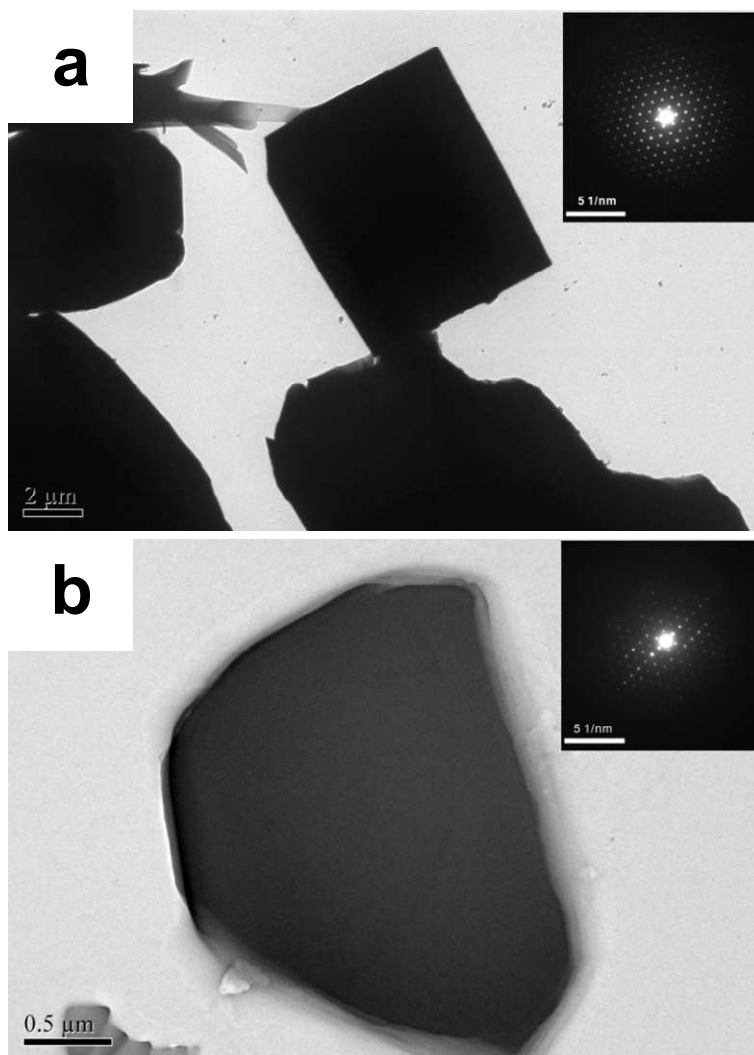

**Figure S1.** TEM micrographs and the corresponding SAED patterns of CoBTC-DMF (a) and CoBTC-DMF/EtOH (b). The uniform-contrast TEM images of CoBTC-DMF and CoBTC-DMF/EtOH clearly demonstrate their solid and dense nature without discernible porosities.

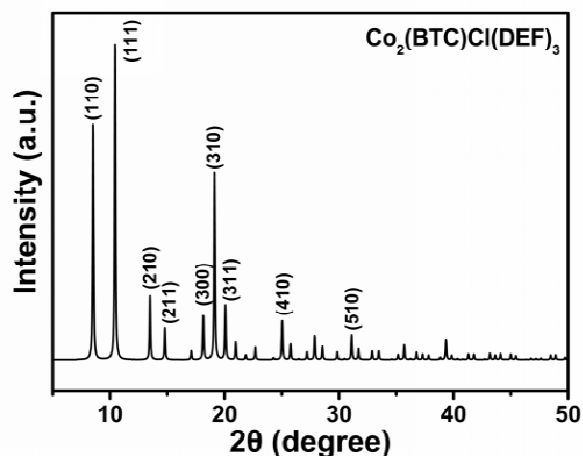

**Figure S2.** XPRD patterns of  $\text{Co}_2(\text{BTC})\text{Cl}(\text{DEF})_3$ .

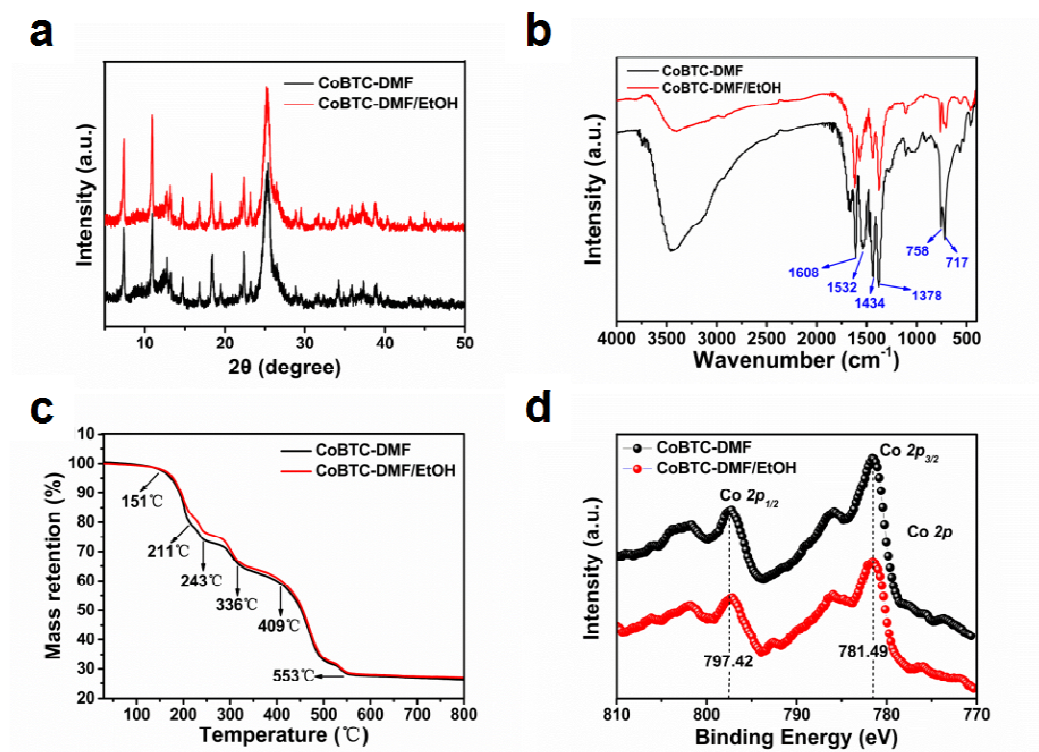

**Figure S3.** (a) XPRD patterns of CoBTC-DMF and CoBTC-DMF/EtOH. The two samples show peaks located at nearly the same angles, and the peaks are sharp and strong, suggesting a relatively high crystallinity. (b) FT-IR spectra of CoBTC-DMF

and CoBTC-DMF/EtOH. The peaks in the regions of 1608-1532  $\text{cm}^{-1}$  can be assigned to the asymmetric stretching vibrations of the carboxylate groups, while the peaks in the regions of 1434-1378  $\text{cm}^{-1}$  can be assigned to the symmetric stretching vibrations of the carboxylate groups. The absence of the sharp absorption band from the vibrations of hydroxide ( $\sim 3600 \text{ cm}^{-1}$ ) indicate that EtOH molecules are not incorporated in CoBTC-DMF/EtOH. (c) TGA curves of CoBTC-DMF and CoBTC-DMF/EtOH under nitrogen atmosphere. It can be observed that the thermal behaviors of CoBTC-DMF and CoBTC-DMF/EtOH are much different from CoBTC-EtOH. Specifically, the weight loss between 151 and 211  $^{\circ}\text{C}$  can be assigned to the removal of  $\text{H}_2\text{O}$  and DMF molecules adsorbed to the surface and those occluded inside the pores, while the weight loss between 243 and 336  $^{\circ}\text{C}$  can be assigned to the removal of coordinated DMF molecules. The gasification of the BTC ligands begins at 409  $^{\circ}\text{C}$  and after the complete break-down of BTC ligands at ca. 553  $^{\circ}\text{C}$ , the remanent materials are then converted to  $\text{Co}_3\text{O}_4$ . (d) High-resolution Co 2p XPS spectra of CoBTC-DMF and CoBTC-DMF/EtOH, from which the existence of  $\text{Co}^{2+}$  are also demonstrated.

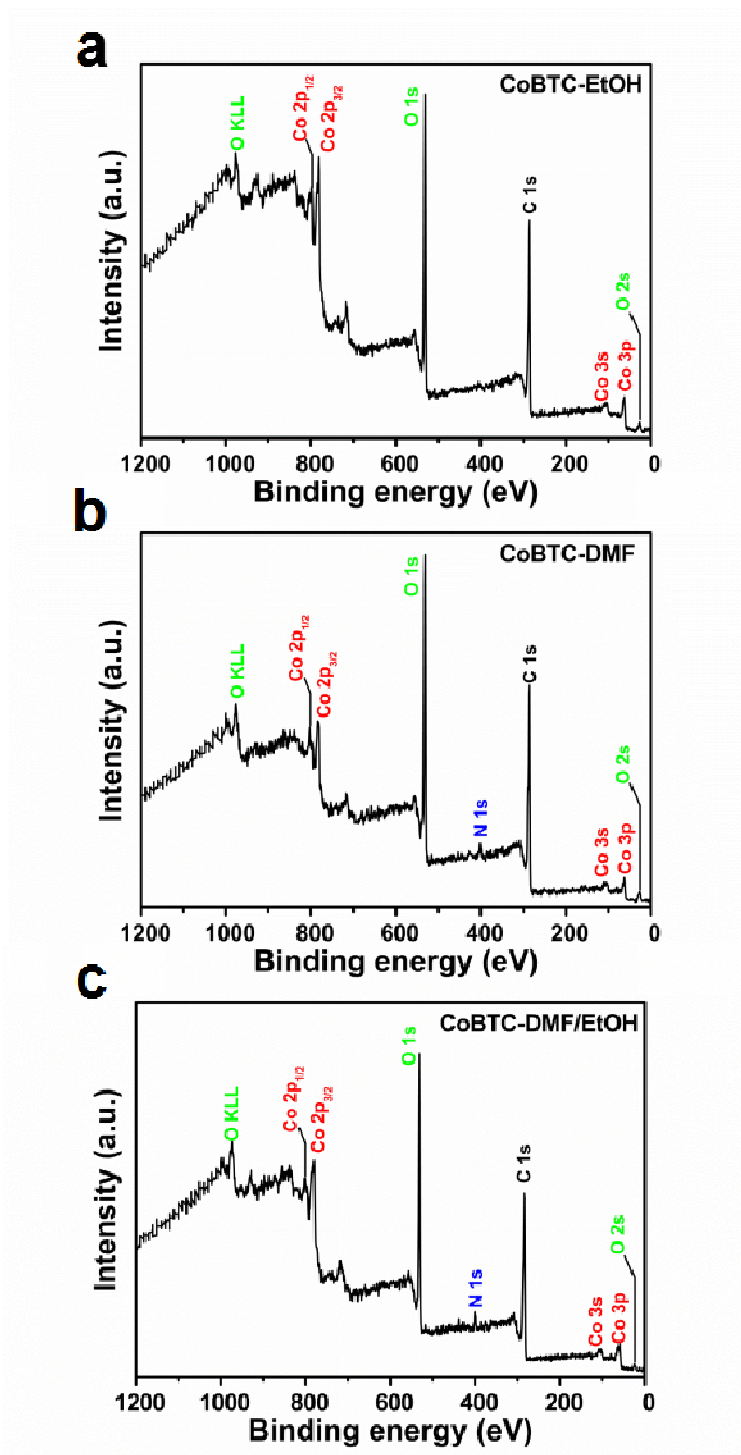

**Figure S4.** XPS surveys of CoBTC-EtOH (a), CoBTC-DMF (b), and CoBTC-DMF/EtOH (c). The expected N element is detected in CoBTC-DMF and CoBTC-DMF/EtOH, suggesting the existence of coordinated DMF in them.

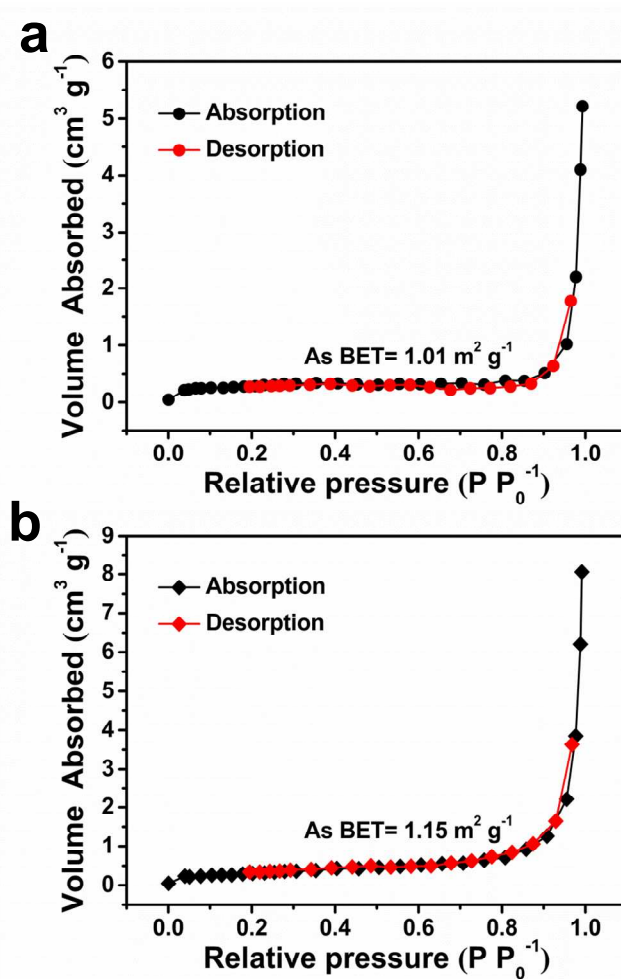

**Figure S5.** Nitrogen adsorption-desorption isotherms of CoBTC-DMF (a) and CoBTC-DMF/EtOH (b). The BET areas of CoBTC-DMF and CoBTC-DMF/EtOH are 1.01 and 1.15 m<sup>2</sup>/g, respectively, which indicate that the two samples have a negligible porosity.

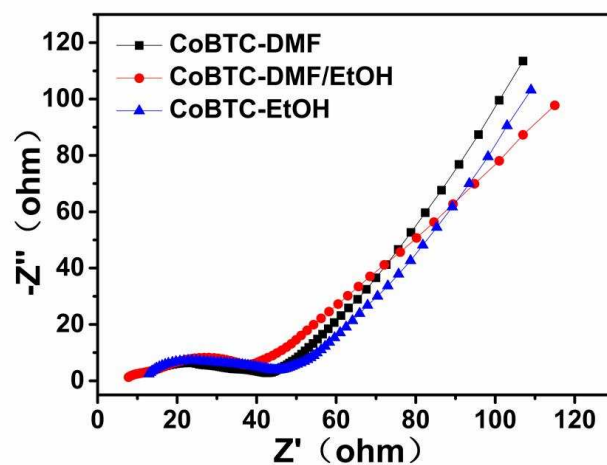

**Figure S6.** EIS spectra of the CoBTC-EtOH, CoBTC-DMF, and CoBTC-DMF/EtOH electrodes at the 100th cycle. It is clearly observed that the  $R_{ct}$  for the CoBTC-EtOH, CoBTC-DMF, and CoBTC-DMF/EtOH electrodes at the 100th cycle are significantly small ( $<40 \Omega$ ), which illustrate the superior cycling performances of the three anodes as well as imply a limited growth of SEI layer and fast solid-state  $\text{Li}^+$  diffusion rate in these electrodes during cycling processes.

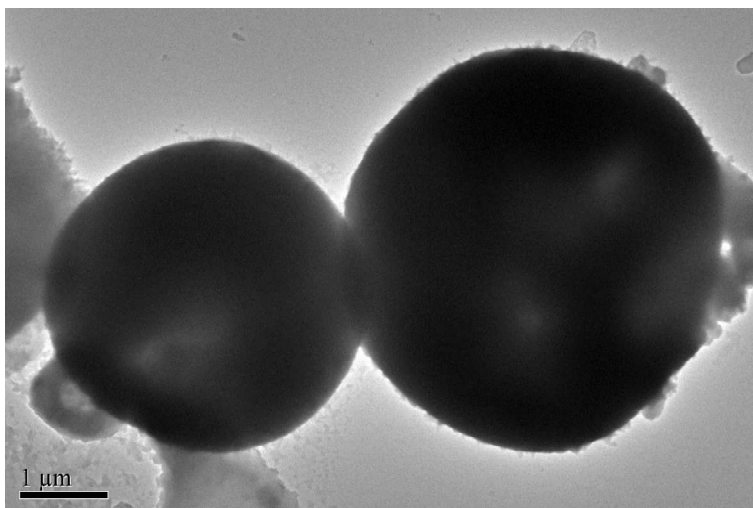

**Figure S7.** Ex-situ TEM image of the CoBTC-EtOH electrode at the fully lithiated state after rate test. The microsphere morphology of CoBTC-EtOH is largely retained after repetitive cycling.

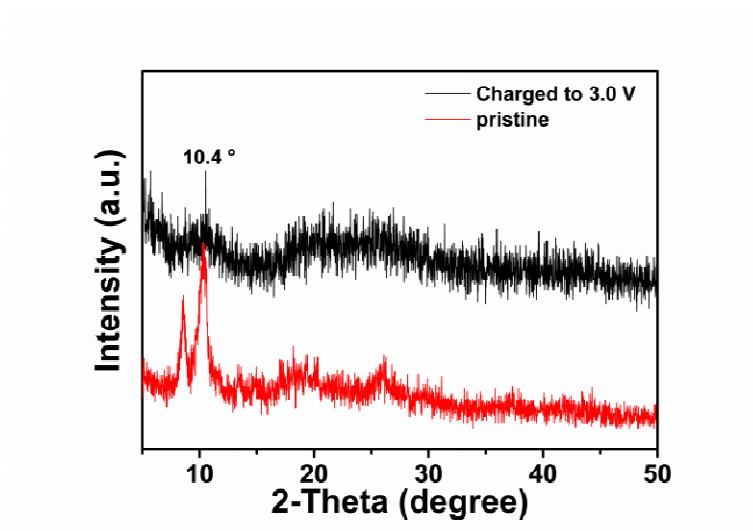

**Figure S8.** XPRD patterns of the charged CoBTC-EtOH, the patterns of the pristine CoBTC-EtOH were also presented. The diffraction peak at  $2\theta = 10.4^\circ$  is detected for the charged sample, suggesting a similar crystal structure after one galvanostatic charge/discharge cycling.



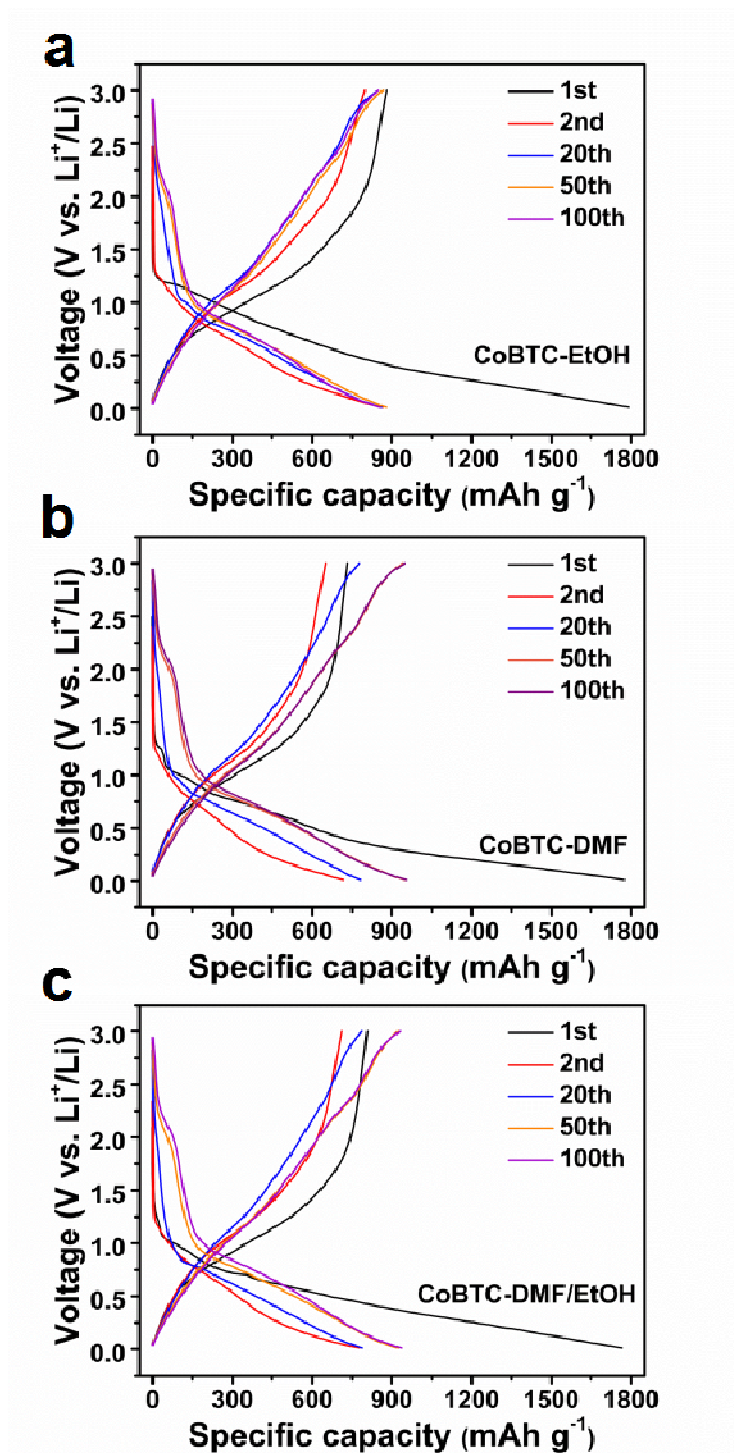

**Figure S9.** Galvanostatic charge-discharge profiles for CoBTC-EtOH (a), CoBTC-DMF (b), and CoBTC-DMF/EtOH (c) at a current density of 100 mA g<sup>-1</sup>. From the 2nd to 50th cycle, the feature at ~2V vs. Li/Li<sup>+</sup> becomes more and more evident, and then become nearly unchanged after 50 cycles. Moreover, the discharge

and charge profiles for CoBTC-EtOH, CoBTC-DMF, and CoBTC-DMF/EtOH are similar after a significant number of cycles, indicating that similar redox reactions are occurring during the charging/discharging processes.

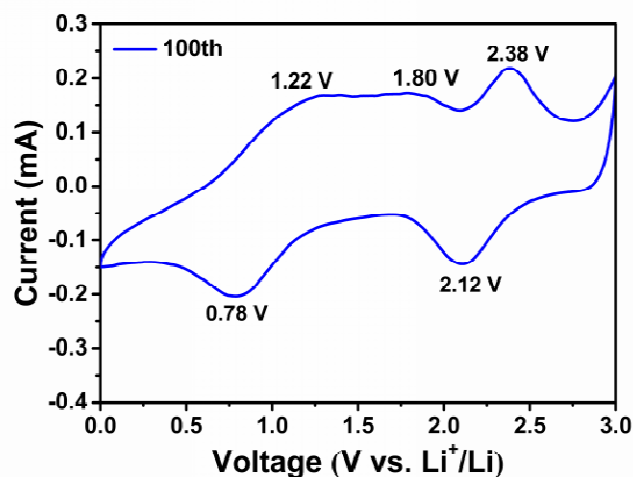

**Figure S10.** Cyclic voltammetry curve for CoBTC-EtOH after 100 cycles at a scan rate of  $0.2 \text{ mV s}^{-1}$ . Two broad cathodic peaks are observed at  $\sim 0.78 \text{ V}$  and  $\sim 2.12 \text{ V}$ , while three anodic peaks are observed at  $\sim 1.22 \text{ V}$ ,  $\sim 1.80 \text{ V}$ , and  $\sim 2.38 \text{ V}$ . The broad nature of the redox peaks is probably indicative of gradual multi-step  $\text{Li}^+$  insertion/deinsertion process. The cathodic peaks centered at  $0.78 \text{ V}$  and the anodic peaks at  $1.22 \text{ V}$ , and  $1.80 \text{ V}$  should be derived from the peaks at  $\sim 0.56 \text{ V}$ ,  $\sim 1.08 \text{ V}$  (cathodic peaks) and  $1.77$ ,  $1.30 \text{ V}$  (anodic peaks) from the 2nd CV cycle, and the positive shift of these redox peaks might be related to some activation processes for the Li-ion insertion. The new pair of peaks at  $\sim 2.12 \text{ V}$  and  $\sim 2.38 \text{ V}$  might be related with a new redox process after a significant number of charge-discharge cycles, which coincide well with the 100th galvanostatic charge-discharge profile in Figure S9a.

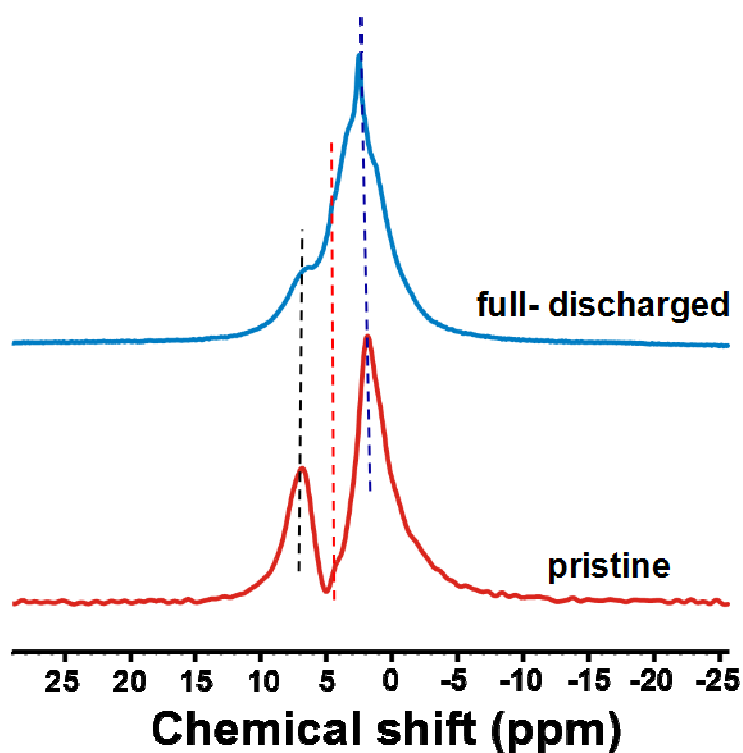

**Figure S11.**  $^1\text{H}$  MAS NMR spectra of the pristine and fully-discharged CoBTC-EtOH electrodes. The  $^1\text{H}$  signal from PVDF binder (2.7 ppm) is covered by the signal from CoBTC-EtOH, the  $^1\text{H}$  signals located at 6.91, 4.29, and 1.91 ppm can be assigned to the three kinds of tertiary  $^1\text{H}$  in the benzene rings of CoBTC-EtOH. It is clearly observed that after  $\text{Li}^+$  insertion to 0.01 V, the shape of the  $^1\text{H}$  spectrum presents obvious variation, and the signal located at 1.91 ppm is shifted to 2.19 ppm, indicating that  $\text{Li}$ -ions are incorporated with the benzene rings (H atoms are only existed in the benzene rings).

**Table S1.** Metal organic frameworks or coordination polymers as anode materials in Li-ion battery

| MOFs                                                                                         | Voltage window (V vs. Li/Li <sup>+</sup> ) | Rate (C or mA g <sup>-1</sup> ) | Capacity retention (mAh g <sup>-1</sup> ) | Cycle number | Refs. |
|----------------------------------------------------------------------------------------------|--------------------------------------------|---------------------------------|-------------------------------------------|--------------|-------|
| Zn <sub>4</sub> O(1,3,5-benzenetribenzoates)                                                 | 0.05-1.6                                   | 50                              | 105                                       | 50           | [S1]  |
| Li terephthalate                                                                             | 0.7-3.0                                    | 1C                              | 234                                       | 50           | [S2]  |
| Zn <sub>3</sub> (HCOO) <sub>6</sub>                                                          | 0.005-3.0                                  | 60                              | 560                                       | 60           | [S3]  |
| Li/Ni-1,4,5,8-naphthalenetetracarboxylates                                                   | 0.01-3.0                                   | 100                             | 475                                       | 80           | [S4]  |
| Mn(tfbdc)(4,4'-bpy)(H <sub>2</sub> O) <sub>2</sub>                                           | 0.01-2.5                                   | 50                              | 390                                       | 50           | [S5]  |
| Co <sub>2</sub> (OH) <sub>2</sub> BDC                                                        | 0.005-3.0                                  | 50                              | 650                                       | 100          | [S6]  |
| [Li <sub>6</sub> (pda) <sub>3</sub> ]·2EtOH                                                  | 0.2-2.0                                    | 30                              | 160                                       | 50           | [S7]  |
| [Cu <sub>2</sub> (C <sub>8</sub> H <sub>4</sub> O <sub>4</sub> ) <sub>4</sub> ] <sub>n</sub> | 0.01-2.5                                   | 24                              | 227                                       | 50           | [S8]  |
| 2,6-Naph-(COOLi) <sub>2</sub>                                                                | 0.5-2.0                                    | 1C                              | ca. 210                                   | 10           | [S9]  |
| Ni-Me <sub>4</sub> bpz                                                                       | 0.01-3.0                                   | 50                              | 120                                       | 100          | [S10] |
| Zn(IM) <sub>1.5</sub> (abIM) <sub>0.5</sub>                                                  | 0.01-3.0                                   | 100, 400                        | 190, ca. 75                               | 200, 200     | [S11] |
| Asp-Cu                                                                                       | 0.01-3.0                                   | 50                              | 233                                       | 100          | [S12] |
| Mn-BTC                                                                                       | 0.01-2.0                                   | 103, 1030                       | 694, 400                                  | 100, 100     | [S13] |
| Co 2,5-furandicarboxylate                                                                    | 0.01-3.0                                   | 100, 1250                       | 549.8, 513.4                              | 95, 499      | [S14] |
| Mn 2,5-thiophenedicarboxylate                                                                | 0.01-3.0                                   | 400                             | 647.5                                     | 250          | [S15] |
| Cu-BTC                                                                                       | 0.05-3.0                                   | 96, 383                         | 740, 474                                  | 50, 50       | [S16] |
| This work                                                                                    | 0.01-3.0                                   | 100, 2000                       | 856, 473                                  | 100, 500     |       |

## Supplementary References

- [S1] Li, X.; Cheng, F.; Zhang, S.; Chen, J. Shape-Controlled Synthesis and Lithium-Storage Study of Metal-Organic Frameworks  $\text{Zn}_4\text{O}(\text{1,3,5-benzenetribenzoate})_2$ . *J. Power Sources* **2006**, *160*, 542-547.
- [S2] Armand, M.; Grugeon, S.; Vezin, H.; Laruelle, S.; Ribière, P.; Poizot, P.; Tarascon, J. M. Conjugated Dicarboxylate Anodes for Li-Ion Batteries, *Nat. Mater.* **2009**, *8*, 120-125.
- [S3] Saravanan, K.; Nagarathinam, M.; Balaya, P.; Vittal, J. J. Lithium Storage in a Metal Organic Framework with Diamondoid Topology-A Case Study on Metal Formates, *J. Mater. Chem.* **2010**, *20*, 8329-8335.
- [S4] Han, X.; Yi, F.; Sun, T.; Sun, J. Synthesis and Electrochemical Performance of Li and Ni 1,4,5,8-Naphthalenetetracarboxylates as Anodes for Li-Ion Batteries, *Electrochem. Commun.* **2012**, *25*, 136-139.
- [S5] Liu, Q.; Yu, L.; Wang, Y.; Ji, Y.; Horvat, J.; Cheng, M.; Jia, X.; Wang, G. Manganese-Based Layered Coordination Polymer: Synthesis, Structural Characterization, Magnetic Property, and Electrochemical Performance in Lithium-Ion Batteries. *Inorg. Chem.* **2013**, *52*, 2817-2822.
- [S6] Gou, L.; Hao, L.; Shi, Y. X.; Ma, S.; Fan, X.; Xu, L.; Li, D.; Wang, K. One-Pot Synthesis of a Metal-Organic Framework as an Anode for Li-Ion Batteries with Improved Capacity and Cycling Stability. *J. Solid State Chem.* **2014**, *210*, 121-124.
- [S7] Liu, Q.; Yu, L.; Wang, Y.; Ji, Y.; Horvat, J.; Cheng, M.; Jia, X.; Wang, G. Manganese-Based Layered Coordination Polymer: Synthesis, Structural Characterization, Magnetic Property, and Electrochemical Performance in Lithium-Ion Batteries. *Inorg. Chem.* **2013**, *52*, 2817-2822.
- [S8] Kumar, R. S.; Nithya, C.; Gopukumar, S.; Anbu, M. Diamondoid-Structured Cu-Dicarboxylate-Based Metal-Organic Frameworks as High-Capacity Anodes for Lithium-Ion Storage, *Energy Technology* **2014**, *2*, 921-927.
- [S9] Ogihara, N.; Yasuda, T.; Kishida, Y.; Ohsuna, T.; Miyamoto, K.; Ohba, N. Organic Dicarboxylate Negative Electrode Materials with Remarkably Small Strain for High-Voltage Bipolar Batteries. *Angew. Chem. Int. Ed.* **2014**, *53*, 11467-11472.

- [S10] An, T.; Wang, Y.; Tang, J.; Wang, Y.; Zhang, L.; Zheng, G. A Flexible Ligand-Based Wavy Layered Metal-Organic Framework for Lithium-Ion Storage. *J. Colloid Interf. Sci.* **2015**, *445*, 320-325.
- [S11] Lin, Y.; Zhang, Q.; Zhao, C.; Li, H.; Kong, C.; Shen, C.; Chen, L. An Exceptionally Stable Functionalized Metal-Organic Framework for Lithium Storage. *Chem. Commun.* **2015**, *51*, 697-699.
- [S12] Zhao, C.; Shen, C.; Han, W. Metal-Organic Nanofibers as Anodes for Lithium-Ion Batteries, *RSC ADV.* **2015**, *5*, 20386-20389.
- [S13] Maiti, S.; Pramanik, A.; Manju, U.; Mahanty, S. Reversible Lithium Storage in Manganese 1,3,5-Benzenetricarboxylate Metal-Organic Framework with High Capacity and Rate Performance. *ACS Appl. Mater. Interfaces* **2015**, *7*, 16357-16363.
- [S14] Fei, H.; Liu, X.; Li, Z. Hollow Cobalt Coordination Polymer Microspheres: A Promising Anode Material for Lithium-Ion Batteries with High Performance. *Chem. Eng. J.* **2015**, *281*, 453-458.
- [S15] Fei, H.; Liu, X.; Li, Z.; Feng, W. Synthesis of Manganese Coordination Polymer Microspheres for Lithium-Ion Batteries with Good Cycling Performance. *Electrochim. Acta* **2015**, *174*, 1088-1095.
- [S16] Maiti, S.; Pramanik, A.; Manju, U.; Mahanty, S.  $\text{Cu}_3(1,3,5\text{-benzenetricarboxylate})_2$  Metal-Organic Framework: A Promising Anode Material for Lithium-Ion Battery. *Micropor. Mesopor. Mater.* **2016**, *226*, 353-359.
